# Supplementary material for: Cryo-EM structure of the respiratory I + III2 supercomplex from Arabidopsis thaliana at 2 Å resolution
Source: PubMed Central journal article supplement (PMC9873573; doi:10.1038/s41477-022-01308-6), 2022-12-30
Supplement: 41477_2022_1308_MOESM1_ESM.pdf [file 41477_2022_1308_MOESM1_ESM.pdf]

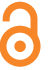

# Cryo-EM structure of the respiratory I + III<sub>2</sub> supercomplex from *Arabidopsis thaliana* at 2 Å resolution

In the format provided by the authors and unedited

## Supplementary Data

Klusch et al. (2022). Cryo-EM structure of the respiratory I + III<sub>2</sub> supercomplex from *Arabidopsis thaliana* at 2 Å resolution

Nature Plants

## List of Supplementary Figures and Tables

### Supplementary Figures

- Supp. Fig. 1: Purification of the *Arabidopsis* I+III<sub>2</sub> supercomplex
- Supp. Fig. 2: Cryo-EM data acquisition and image processing of the *Arabidopsis* I+III<sub>2</sub> supercomplex
- Supp. Fig. 3: Fourier shell correlation (FSC) curves for the final post-processed and density-modified multibody maps
- Supp. Fig. 4: Fourier shell correlation (FSC) curves for final post-processed conformation maps
- Supp. Fig. 5: Activity of the purified I+III<sub>2</sub> supercomplex from *Arabidopsis*
- Supp. Fig. 6: Comparison of the I+III<sub>2</sub> supercomplex from *Arabidopsis* obtained by single particle negative stain EM (Dudkina et al. 2005) and by cryo-EM (this study)

### Supplementary Tables

- Supp. Tab. 1: EM Statistics
- Supp. Tab. 2: Cryo-EM map identifiers and quality statistics
- Supp. Tab. 3: Model identifiers and quality statistics
- Supp. Tab. 4: Subunits of the *Arabidopsis* I+III<sub>2</sub> supercomplex identified by mass spectrometry
- Supp. Tab. 5: Nomenclature of complex I subunits in *Arabidopsis* and other model species
- Supp. Tab. 6: Nomenclature of complex III subunits in *Arabidopsis* and other model species
- Supp. Tab. 7: Calculated properties of the 48 complex I subunits of *Arabidopsis*
- Supp. Tab. 8: Calculated properties of the 10 complex III subunits of *Arabidopsis*
- Supp. Tab. 9: Amino acid composition of *Arabidopsis* complex III<sub>2</sub> (2x10 subunits) and *Arabidopsis* complex I (48 subunits)

### Supplementary Videos (extra files)

- Supp. Video 1: Three dimensional cryo-EM density map of the *Arabidopsis* I+III<sub>2</sub> supercomplex at around 2 Å resolution with corresponding atomic model
- Supp. Video 2: High resolution map density around the N2 iron sulfur cluster in the peripheral arm of complex I.

### References

## Supplementary Figures

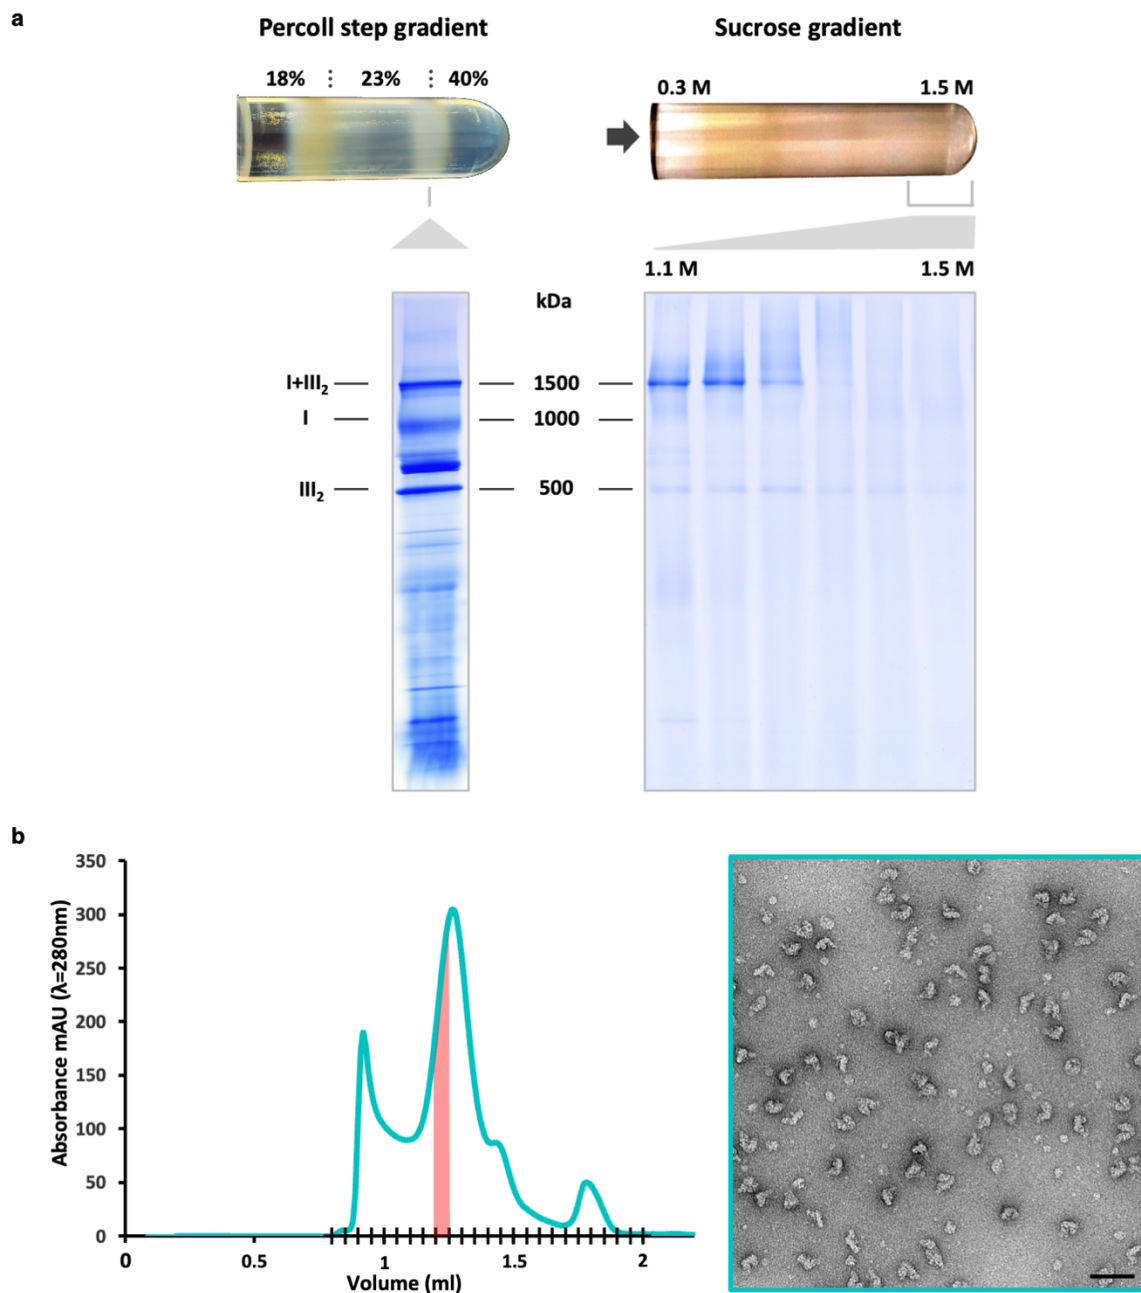

### Supplementary Fig. 1: Purification of the *Arabidopsis* I+III<sub>2</sub> supercomplex.

**a**, *Arabidopsis* mitochondria were purified by Percoll step density gradient centrifugation (left). Mitochondria accumulated at the 23%/40% Percoll interface (for details see Materials and Methods). Subsequently, mitochondria were solubilized with digitonin and protein complexes were separated by sucrose gradient ultracentrifugation (right). The protein composition of gradient fractions was monitored by one-dimensional Blue native PAGE (gels below gradients). Fractions at 1.1 M sucrose were highly enriched in I+III<sub>2</sub> supercomplex. **b**, For further purification, digitonin was replaced by the synthetic digitonin analogue glyco-diosgenin (GDN), first by buffer exchange during step concentration, followed by size-exclusion chromatography. Negative-stain EM indicates a majority of intact I+III<sub>2</sub> supercomplex particles. Scale bar, 50 nm.

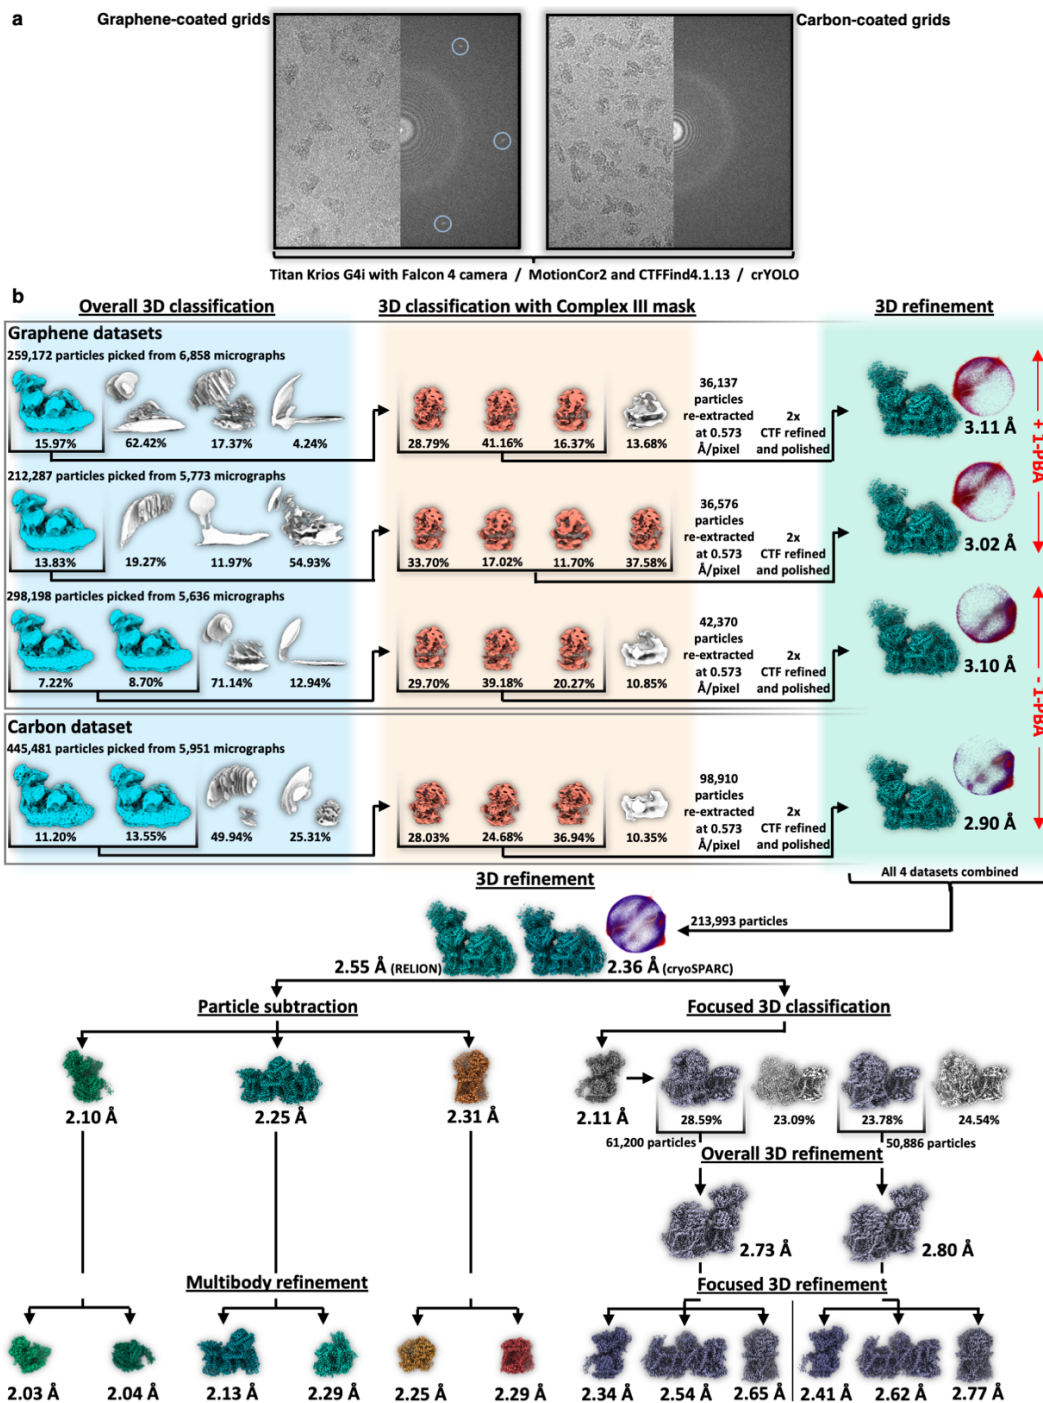

**Supplementary Fig. 2: Cryo-EM data acquisition and image processing of the *Arabidopsis* I+III<sub>2</sub> supercomplex.**

**a**, Images were recorded with a Titan Krios G4i microscope equipped with a cold field emission gun and a Falcon 4 camera in electron-counting mode. Images were collected from graphene or carbon-coated grids. The reciprocal lattice of graphene in the Fourier transform is indicated by circles. **b**, Four datasets were collected, three on graphene, one on carbon coated grids. Support films were treated with (+ 1-PBA) or without (- 1-PBA) 1-polybutyric acid, which improved the angular distribution. After initial 3D classification, complex III<sub>2</sub> was masked to exclude unassociated complex I. The polished and CTF-refined datasets were combined, resulting in an overall resolution of 2.55 Å in RELION. The resolution was further improved by particle subtraction and multibody refinement, resulting in a resolution of 2.03 Å for the complex I peripheral arm, 2.13 Å for the complex I membrane arm, and up to 2.25 Å for the complex III dimer. To separate different conformations, particles were first aligned by the peripheral arm of complex I. Subsequently, focused 3D classification was carried out with a mask around the complex I membrane arm and complex III<sub>2</sub>. The two most different classes were refined further, resulting in two classes with overall resolutions of 2.73 Å and 2.80 Å. Focused 3D refinement around the complex I peripheral arm, complex I membrane arm and complex III<sub>2</sub>, improved the resolution of the two conformations to 2.34 Å and 2.41 Å, respectively.

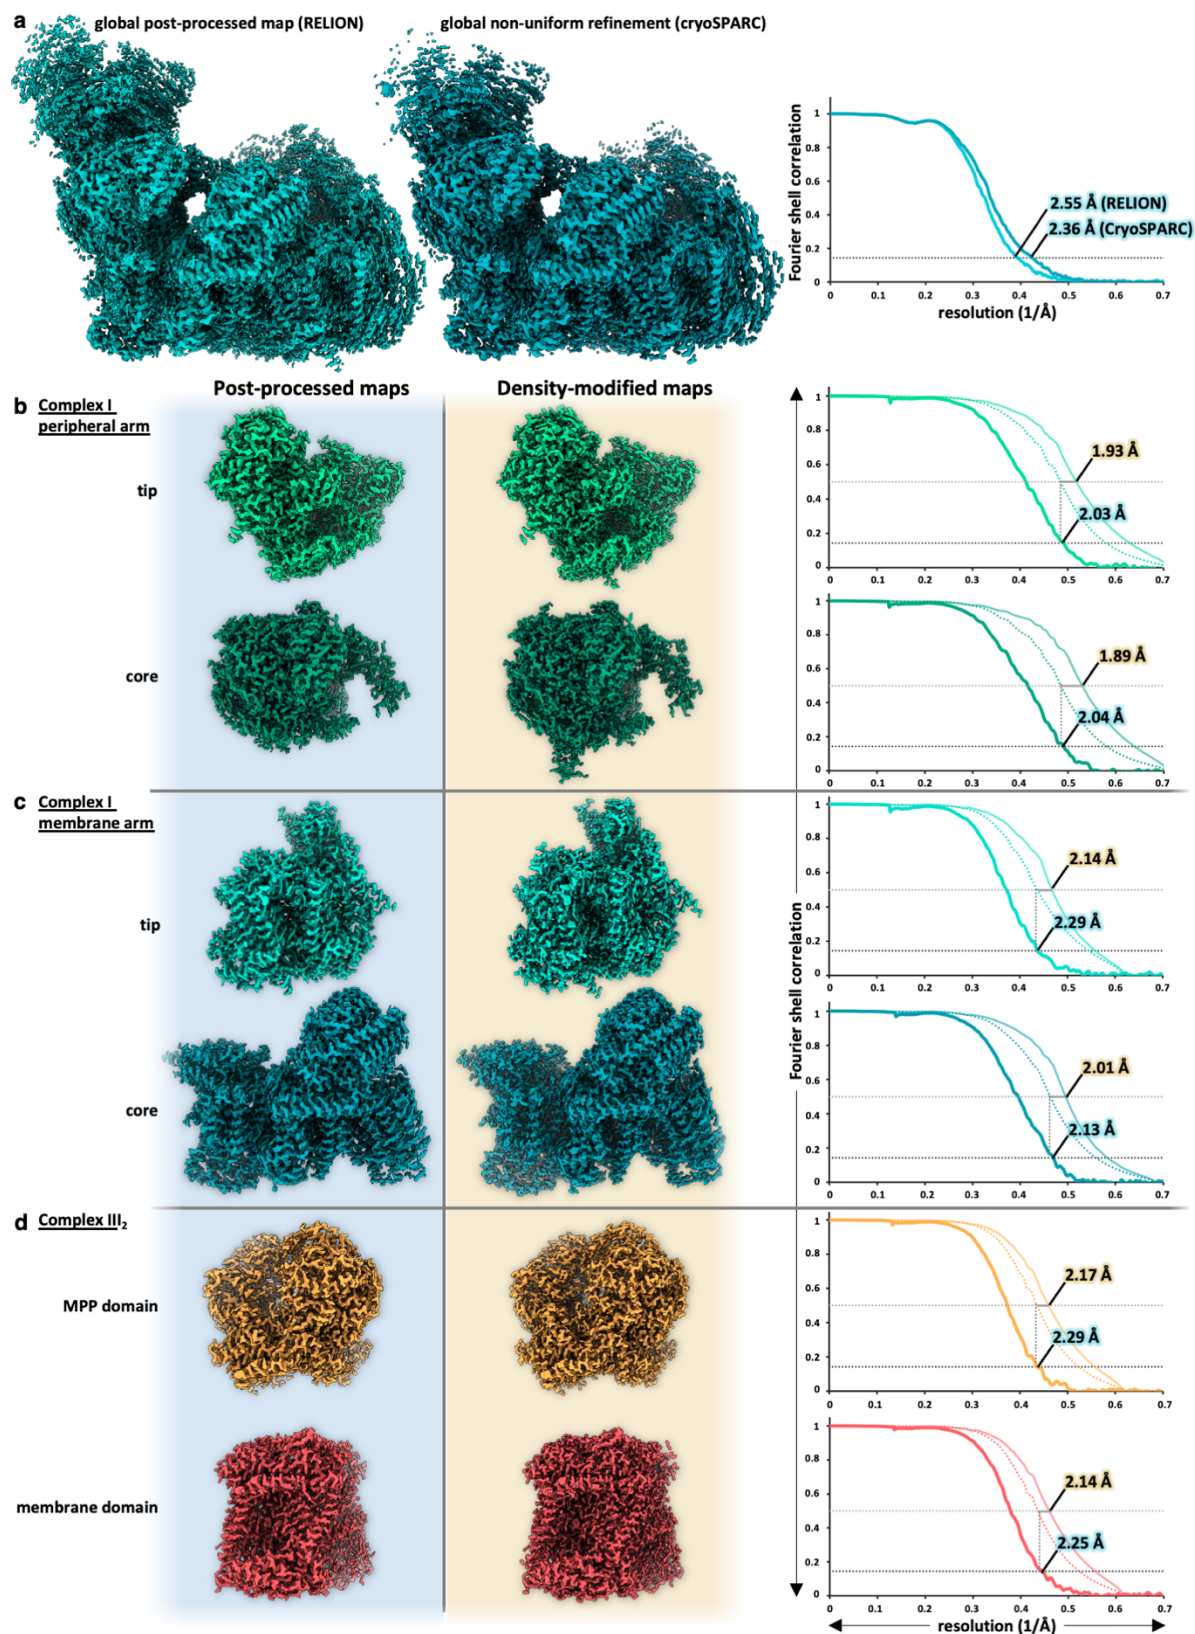

**Supplementary Fig. 3: Fourier shell correlation (FSC) curves for final post-processed and density-modified multibody maps.** **a**, Overall map and gold-standard FSC curve. **b-d**, Final maps of the complex I peripheral arm (**b**), complex I membrane arm (**c**) and complex III<sub>2</sub> (**d**). Gold-standard FSCs of post-processing steps to estimate map resolution by the 0.143 criterion are indicated by continuous curves. Density modification improved the map quality. The corresponding estimated resolution-dependent map accuracy values (FSC<sub>ref</sub>) of the original and modified map are indicated by dashed or faint continuous curves. Straight grey lines indicate the resolution improvement at 0.5 FSC.

**a** Conformation 1

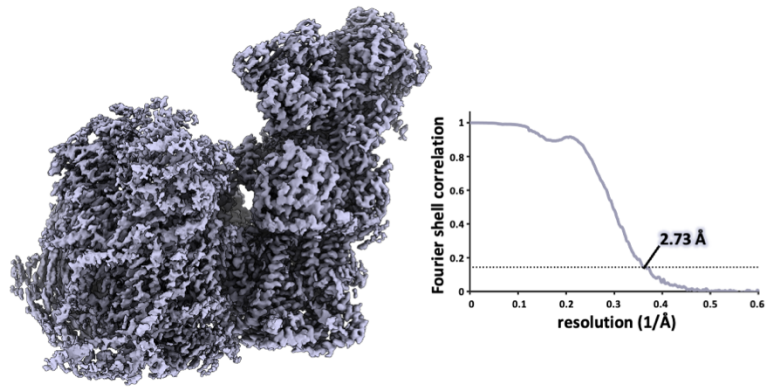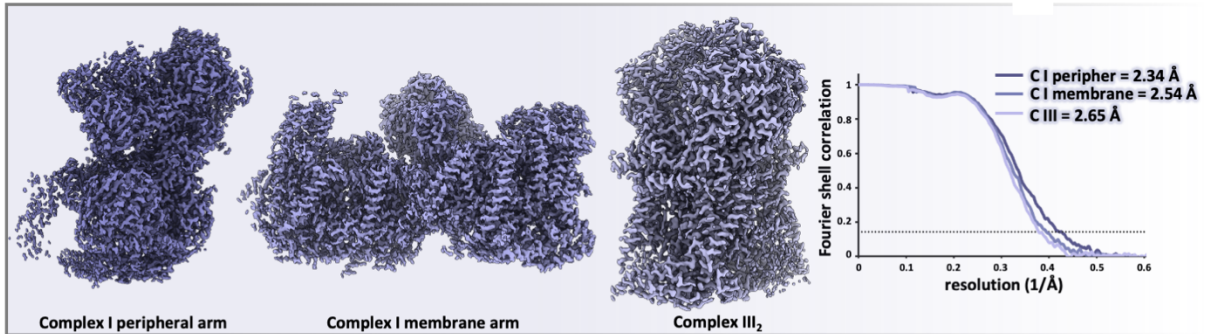

**b** Conformation 2

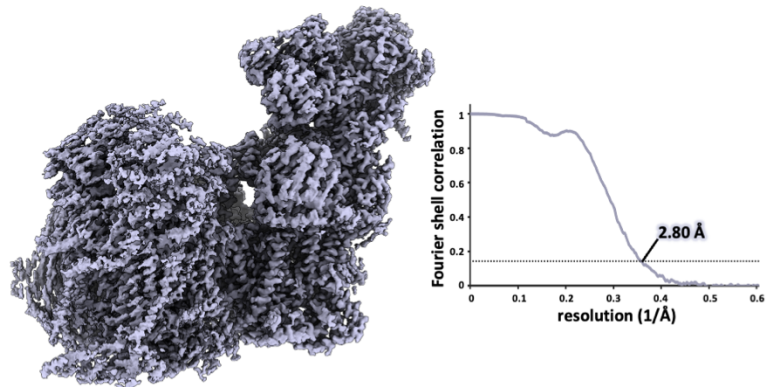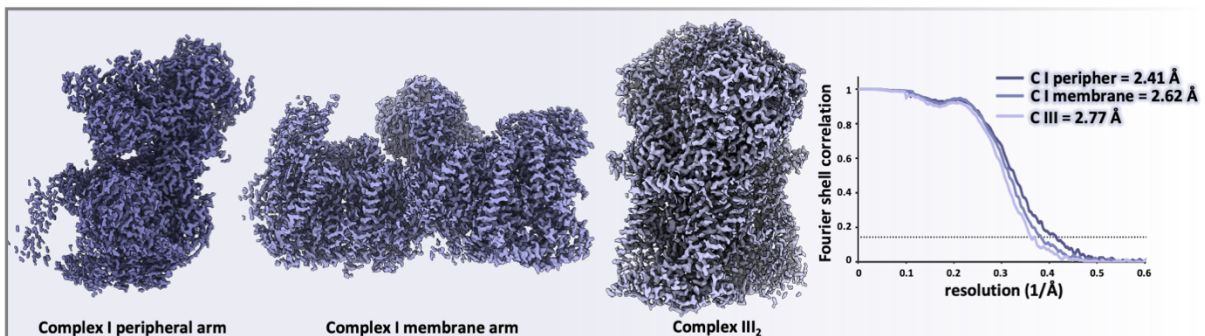

**Supplementary Fig. 4: Fourier shell correlation (FSC) curves for final post-processed conformations.** Overall map of the *Arabidopsis* I+III<sub>2</sub> supercomplex in conformation 1 (a) and conformation 2 (b) with corresponding focused 3D refined maps of the complex I peripheral arm, complex I membrane arm and dimeric complex III<sub>2</sub>. Resolution of the final maps was estimated by gold-standard FSC curves with the 0.143 criterion.

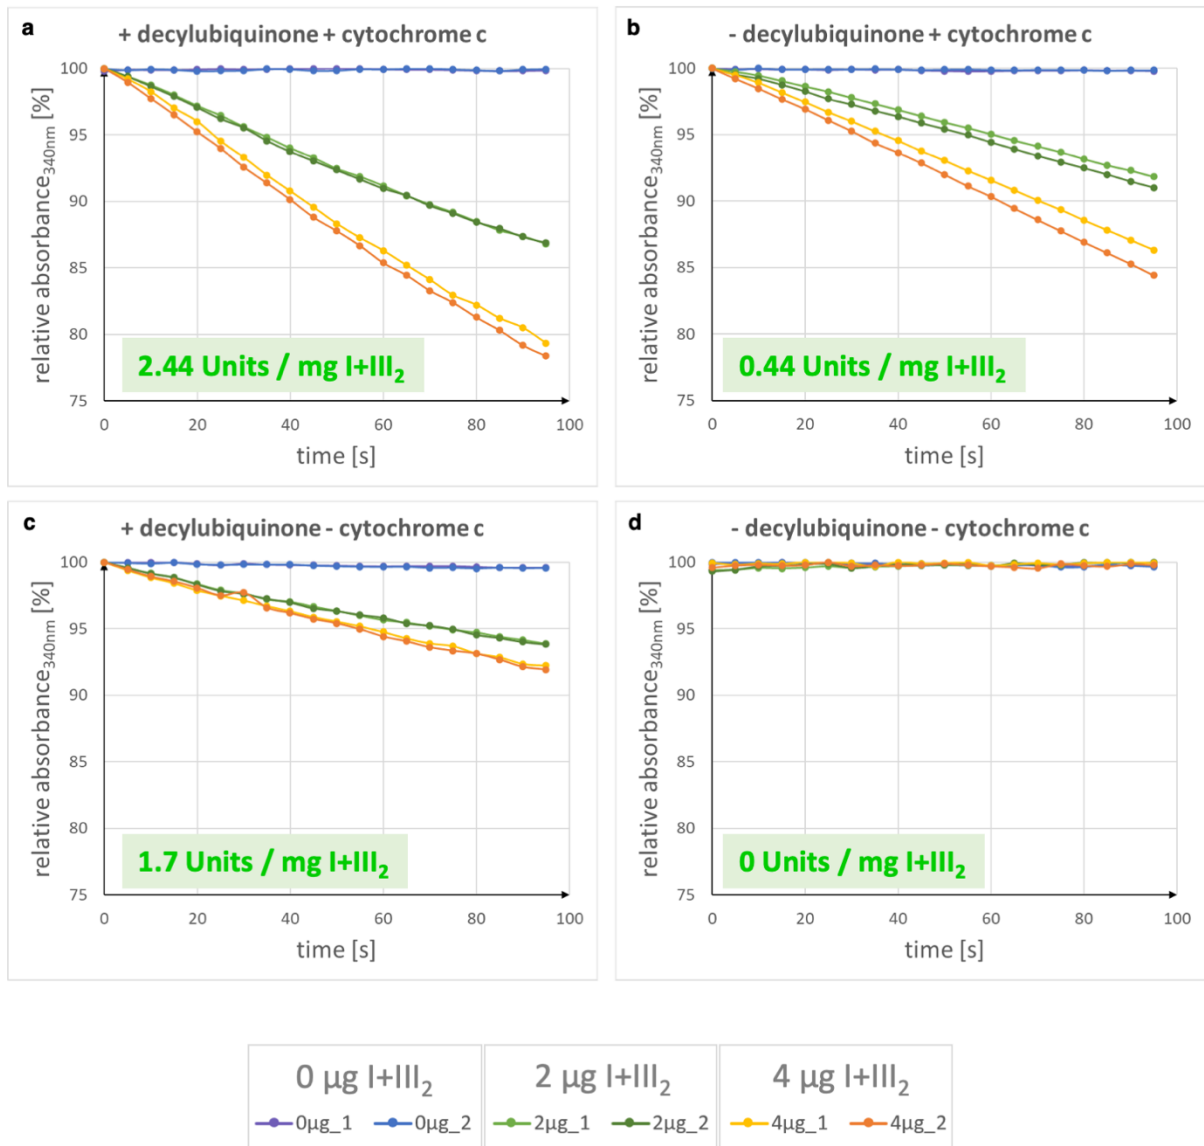

**Supplementary Fig. 5: Activity of the purified I+III<sub>2</sub> supercomplex from *Arabidopsis*.** Activity was measured (a) with decylubiquinone and cytochrome; (b) with decylubiquinone but without cytochrome c; (c) without decylubiquinone but with cytochrome c; and (d) without both decylubiquinone or cytochrome c. Absorbance was determined for >90 s at 340 nm (NADH). All four conditions were replicated twice. (i) A blank sample (0 μg I+III<sub>2</sub> supercomplex; 0μg\_1, 0μg\_2), (ii) 2 μg I+III<sub>2</sub> supercomplex (2μg\_1, 2μg\_2), (iii) 4 μg I+III<sub>2</sub> supercomplex (4μg\_1, 4μg\_2). Average enzyme activity (units / mg I+III<sub>2</sub> supercomplex) determined in each setup are given in green at the bottom of the diagrams. For experimental details see Materials and Methods.



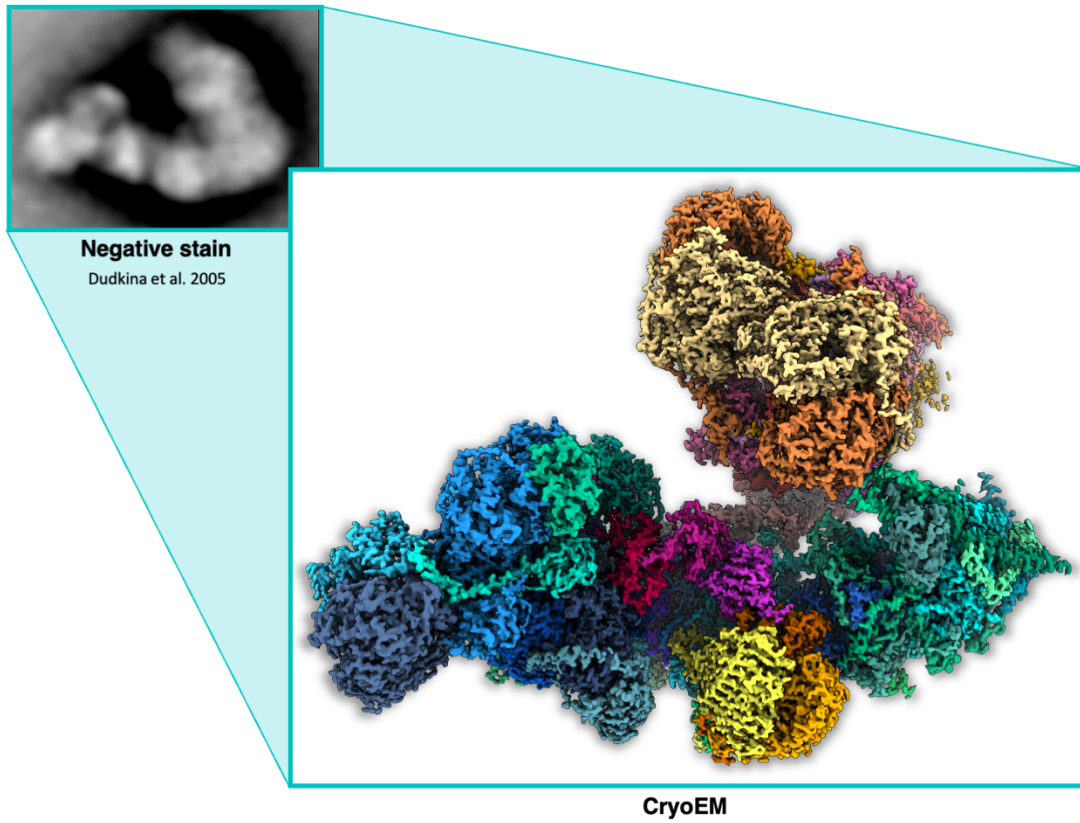

Supplementary Fig. 6: Comparison of the I+III<sub>2</sub> supercomplex from *Arabidopsis* obtained by negative stain EM<sup>1</sup> and by cryo-EM (this study).

## Supplementary Tables

**Supplementary Table 1: EM Statistics**

| <b>Data Collection</b>                  |                                                        |
|-----------------------------------------|--------------------------------------------------------|
| Electron Microscope                     | Titan Krios G4i                                        |
| Camera                                  | Falcon 4 (electron-counting mode)                      |
| Data collection software                | EPU with Aberration-free image shift (AFIS)            |
| Voltage                                 | 300 kV                                                 |
| Nominal magnification                   | 215,000 x                                              |
| Calibrated physical pixel size          | 0.573 Å                                                |
| Total exposure                          | 50 e <sup>-</sup> Å <sup>-2</sup>                      |
| Exposure rate                           | 3.4 e <sup>-</sup> pixel <sup>-1</sup> s <sup>-1</sup> |
| Number of frames                        | 1,118 raw frames                                       |
| Defocus range                           | -0.5 to -1.5 μm                                        |
| <b>Image Processing</b>                 |                                                        |
| Motion correction software              | MotionCor2                                             |
| CTF estimation software                 | CTFFind4.1.13                                          |
| Particle selection software             | crYOLO                                                 |
| Micrographs used                        | 24,218 movies in EER format                            |
| Particles selected                      | 1,215,138                                              |
| Classification and refinement software  | Relion3.1.3                                            |
| Particles contributing to final dataset | 213,993 (115,083 on graphene / 98,910 on carbon)       |
| Density modification software           | Phenix (phenix.resolve_cryo_em)                        |
| <b>Model Building</b>                   |                                                        |
| Modeling software                       | Coot                                                   |
| Refinement software                     | Phenix (phenix.real_space_refine)                      |

**Supplementary Table 2: Cryo-EM map identifiers and quality statistics**

| Description              | PDB ID | EMDB ID   | Resolution (0.143) | Applied B-factor | # of particles | Symm. |
|--------------------------|--------|-----------|--------------------|------------------|----------------|-------|
| CI Peripheral arm tip    | 8BED   | EMD-15998 | 2.03Å              | -22.6            | 213,993        | C1    |
| CI Peripheral arm core   | 8BEE   | EMD-15999 | 2.04 Å             | -22.3            | 213,993        | C1    |
| CI Membrane arm core     | 8BEF   | EMD-16000 | 2.13 Å             | -26.8            | 213,993        | C1    |
| CI Membrane arm tip      | 8BEH   | EMD-16003 | 2.29 Å             | -29.3            | 213,993        | C1    |
| CIII Membrane domain     | 8BEL   | EMD-16007 | 2.25 Å             | -28.7            | 213,993        | C1    |
| CIII MPP domain          | 8BEP   | EMD-16008 | 2.29 Å             | -29.8            | 213,993        | C1    |
| Composite map            | 8BPX   | EMD-16168 | -                  | -                | 213,993        | C1    |
| Composite Conformation 1 | 8BQ5   | EMD-16171 | -                  | -                | 213,993        | C1    |
| Composite Conformation 2 | 8BQ6   | EMD-16172 | -                  | -                | 213,993        | C1    |

**Supplementary Table 3: Model identifiers and quality statistics**

| Description              | PDB ID | EMDB ID   | Residues built | RMS Bonds Length/Angles |       | Ramachandran Outliers (%) | Ramachandran favoured (%) | Rotamer outliers (%) | Clashscore | EMRinger score |
|--------------------------|--------|-----------|----------------|-------------------------|-------|---------------------------|---------------------------|----------------------|------------|----------------|
| CI Peripheral arm tip    | 8BED   | EMD-15998 | 1,607          | 0.006                   | 0.765 | 0.00                      | 97.17                     | 0.37                 | 7.63       | 6.04           |
| CI Peripheral arm core   | 8BEE   | EMD-15999 | 1,627          | 0.010                   | 1.129 | 0.00                      | 96.01                     | 0.85                 | 8.27       | 6.25           |
| CI Membrane arm core     | 8BEF   | EMD-16000 | 3,170          | 0.012                   | 1.008 | 0.00                      | 97.88                     | 0.86                 | 12.16      | 5.43           |
| CI Membrane arm tip      | 8BEH   | EMD-16003 | 1,589          | 0.010                   | 1.354 | 0.00                      | 97.76                     | 1.55                 | 12.51      | 4.58           |
| CIII Membrane domain     | 8BEL   | EMD-16007 | 2,054          | 0.010                   | 1.133 | 0.00                      | 97.04                     | 0.98                 | 11.71      | 4.63           |
| CIII MPP domain          | 8BEP   | EMD-16008 | 2,140          | 0.007                   | 0.970 | 0.00                      | 97.32                     | 1.38                 | 10.35      | 4.28           |
| Composite map            | 8BPX   | EMD-16168 | 12,187         | 0.010                   | 1.157 | 0.01                      | 97.23                     | 1.01                 | 13.03      | 5.01           |
| Composite Conformation 1 | 8BQ5   | EMD-16171 | 12,187         | 0.011                   | 1.202 | 0.01                      | 97.25                     | 1.13                 | 12.89      | 3.85           |
| Composite Conformation 2 | 8BQ6   | EMD-16172 | 12,187         | 0.010                   | 1.209 | 0.01                      | 97.24                     | 0.97                 | 12.57      | 3.74           |

| I+III subunit   | Accession   | Unique peptides | Coverage [%] | Molecular mass | No. of residues | iBAQ ↓   |
|-----------------|-------------|-----------------|--------------|----------------|-----------------|----------|
| MPP-β           | AT3G02090.1 | 34              | 69.7         | 56.2           | 506             | 14856000 |
| CA2             | AT1G47260.1 | 15              | 57.2         | 29.9           | 277             | 11734000 |
| MPP-α-1         | AT1G51980.1 | 21              | 62.8         | 51.5           | 477             | 11376000 |
| QCR7-1 (14 kDa) | AT4G32470.1 | 4               | 40.2         | 14.4           | 121             | 11152000 |
| B16.6-2         | AT2G33220.1 | 2               | 9.8          | 16.0           | 142             | 9665400  |
| Cyt c1-2        | AT3G27240.1 | 6               | 28           | 27.1           | 243             | 9368100  |
| B14.5a          | AT5G08060.1 | 7               | 72.5         | 14.9           | 130             | 9073200  |
| B22             | AT4G34700.1 | 10              | 72.6         | 13.5           | 116             | 7855500  |
| ND9 / 30 kDa    | ATMG00070.E | 10              | 58.9         | 22.9           | 190             | 7297700  |
| 39 kDa          | AT2G20360.1 | 23              | 66.7         | 37.7           | 344             | 6885100  |
| PSST            | AT5G11770.1 | 10              | 46.8         | 21.6           | 196             | 6849400  |
| Cyt b           | ATMG00220.E | 4               | 10.9         | 44.2           | 392             | 6593500  |
| QCR9            | AT3G52730.1 | 5               | 31.9         | 8.4            | 72              | 6203300  |
| NUXM            | AT4G16450.2 | 6               | 64.2         | 11.3           | 106             | 5930100  |
| ND7 / 49 kDa    | ATMG00510.E | 18              | 47.2         | 44.8           | 393             | 5888500  |
| B13             | AT5G52840.1 | 14              | 65.7         | 17.9           | 158             | 5722000  |
| B17.2           | AT3G03100.1 | 10              | 57.9         | 18.2           | 158             | 5718100  |
| 75 kDa          | AT5G37510.1 | 37              | 60.5         | 74.8           | 686             | 5707300  |
| B14.7           | AT2G42210.4 | 7               | 64.8         | 17.0           | 159             | 5357900  |
| B14.5b          | AT4G20150.1 | 6               | 49.4         | 9.1            | 80              | 5106900  |
| 51 kDa          | AT5G08530.1 | 24              | 56.4         | 50.1           | 456             | 4933400  |
| 18 kDa          | AT5G67590.1 | 7               | 48.1         | 14.4           | 130             | 4452000  |
| CAL1            | AT5G63510.1 | 5               | 20.2         | 25.1           | 230             | 4246500  |
| QCR10           | AT2G40765.1 | 4               | 43.9         | 5.8            | 56              | 4209000  |
| ND2             | ATMG01320.E | 6               | 11.4         | 55.5           | 499             | 4139400  |
| FDX-CI          | AT3G07480.1 | 9               | 60.4         | 14.5           | 132             | 4091200  |
| Cyt c1-1        | AT5G40810.2 | 6               | 33.1         | 27.2           | 243             | 3814700  |
| Rieske-1        | AT5G13430.1 | 11              | 40.1         | 23.2           | 212             | 3568600  |
| QCR8-2          | AT5G05370.1 | 2               | 26.4         | 8.3            | 71              | 3538300  |
| CA3             | AT5G66510.1 | 9               | 62.4         | 27.7           | 257             | 3534800  |
| B15             | AT2G31490.1 | 4               | 43.7         | 8.2            | 70              | 3380900  |
| B12-2           | AT2G02510.1 | 3               | 29.2         | 7.9            | 71              | 3139100  |
| TYKY-1          | AT1G79010.1 | 4               | 15.3         | 23.7           | 206             | 3083300  |
| P2              | AT2G27730.1 | 4               | 39.8         | 11.8           | 112             | 2926100  |
| CAL2            | AT3G48680.1 | 4               | 23.8         | 25.0           | 230             | 2899900  |
| 24 kDa          | AT4G02580.1 | 9               | 40.8         | 24.6           | 222             | 2728400  |
| B8              | AT5G47890.1 | 4               | 48.5         | 10.7           | 96              | 2488800  |
| PDSW-1          | AT3G18410.2 | 3               | 27.4         | 12.3           | 105             | 2412400  |
| ND1             | ATMG01275.E | 6               | 18.2         | 36.0           | 325             | 1875200  |
| ND4             | ATMG00580.E | 5               | 10.9         | 55.9           | 494             | 1717800  |
| B14             | AT3G12260.1 | 8               | 74.4         | 15.0           | 132             | 1667700  |
| CA1             | AT1G19580.1 | 13              | 53.1         | 29.8           | 274             | 1655200  |
| B9              | AT2G46540.1 | 2               | 36.9         | 6.7            | 64              | 1652400  |
| PDSW-2          | AT1G49140.1 | 4               | 35.5         | 12.4           | 106             | 1583800  |
| MPP-α-2         | AT3G16480.1 | 10              | 24           | 51.1           | 473             | 1493700  |
| P1 (SGDH)       | AT1G67350.2 | 8               | 82.7         | 11.7           | 97              | 1485900  |
| 15 kDa-1        | AT3G62790.1 | 2               | 25.3         | 9.8            | 82              | 1404300  |
| B18             | AT2G02050.1 | 6               | 61.2         | 11.7           | 103             | 1276900  |
| ND5             | ATMG00513.E | 10              | 17.2         | 74.5           | 669             | 1270900  |
| QCR6-1 (Hinge)  | AT1G15120.1 | 6               | 68.1         | 7.9            | 68              | 1047100  |
| AGGG            | AT1G76200.1 | 1               | 14.5         | 7.4            | 68              | 1037000  |
| MWFE            | AT3G08610.1 | 1               | 20           | 7.2            | 64              | 1035500  |
| KFYI            | AT4G00585.1 | 6               | 64.8         | 9.7            | 87              | 850830   |
| TYKY-2          | AT1G16700.1 | 3               | 13.5         | 23.6           | 206             | 827880   |
| ND3             | ATMG00990.E | 1               | 12.6         | 13.9           | 119             | 825730   |
| B16.6-1         | AT1G04630.1 | 2               | 9.8          | 16.0           | 142             | 744950   |
| ND6             | ATMG00270.E | 2               | 6.8          | 23.7           | 205             | 740400   |
| ND4L            | ATMG00650.E | 1               | 13           | 11.2           | 100             | 609300   |
| ASHI            | AT5G47570.1 | 2               | 13.6         | 10.2           | 95              | 271760   |
| ESSS-2          | AT3G57785.1 | 3               | 20.2         | 10.1           | 91              | 231000   |
| PGIV-2          | AT5G18800.2 | 2               | 30.2         | 11.8           | 105             | 186910   |
| QCR7-2 (14 kDa) | AT5G25450.1 | 3               | 33.6         | 14.5           | 121             | 176920   |
| 13 kDa          | AT3G03070.1 | 1               | 11.8         | 9.7            | 88              | 169770   |
| P9              | AT1G67785.1 | 1               | 19           | 7.4            | 62              | 142960   |
| SDAP-1          | AT1G65290.1 | 1               | 14.3         | 14.2           | 126             | 140490   |
| SDAP-2          | AT2G44620.1 | 3               | 23           | 13.7           | 122             | 108310   |
| PGIV-1          | AT3G06310.1 | 1               | 23.1         | 12.2           | 108             | 16910    |

**Supplementary Table 4: Subunits of *Arabidopsis* I+III<sub>2</sub> supercomplex identified by mass spectrometry.** Column 1: names of subunits in blue for complex I / in red for complex III<sub>2</sub> (see Supplementary Tables 5 and 6 for nomenclatures of complex I and complex III<sub>2</sub> subunits in different species); Column 2: Accession numbers (TAIR, <https://www.arabidopsis.org/>); column 3: number of unique peptides; column 4: sequence coverage [%]; column 5: calculated molecular mass of the mature proteins [kDa]. Column 6: Number of amino acids of the mature proteins. Column 7: Intensity-based absolute quantification (iBAQ) score.

| <i>A. thaliana</i>                                      | accession                           | <i>C. reinhardtii</i> | accession     | bovine | human     | <i>Yarrowia</i> | <i>E. coli</i> | <i>T. therm.</i> |
|---------------------------------------------------------|-------------------------------------|-----------------------|---------------|--------|-----------|-----------------|----------------|------------------|
| <b>► Peripheral arm (incl. bridge domain)</b>           |                                     |                       |               |        |           |                 |                |                  |
| -                                                       |                                     | 10 kDa                | Cre03.g178250 | 10 kDa | NDUFV3    | -               | -              | -                |
| 13 kDa                                                  | At3g03070                           | 13 kDa                | Cre03.g146247 | 13 kDa | NDUFS6    | NUMM            | -              | -                |
| 18 kDa                                                  | At5g67590                           | 18 kDa                | Cre10.g450400 | 18 kDa | NDUFS4    | NUYM            | -              | -                |
| 24 kDa                                                  | At4g02580                           | 24 kDa                | Cre10.g434450 | 24 kDa | NDUFV2    | NUHM            | NUOE           | NQO2             |
| 39 kDa                                                  | At2g20360                           | 39 kDa                | Cre10.g422600 | 39 kDa | NDUFA9    | NUEM            | -              | -                |
| 51 kDa                                                  | At5g08530                           | 51 kDa                | Cre12.g535950 | 51 kDa | NDUFV1    | NUBM            | NUOF           | NQO1             |
| 75 kDa                                                  | At5g37510                           | 75 kDa                | Cre16.g679500 | 75kDa  | NDUFS10   | NUAM            | NUOG           | NQO3             |
| B8                                                      | At5g47890                           | B8                    | Cre13.g568800 | B8     | NDUFA2    | NI8M            | -              | -                |
| B13                                                     | At5g52840                           | B13                   | Cre12.g484700 | B13    | NDUFA5    | NUFM            | -              | -                |
| B14                                                     | At3g12260                           | B14                   | Cre12.g555250 | B14    | NDUFA6    | NB4M            | -              | -                |
| B14.5a                                                  | At5g08060                           | B14.5a                | Cre11.g467767 | B14.5a | NDUFA7    | NUZM            | -              | -                |
| B17.2                                                   | At3g03100                           | B17.2                 | Cre09.g405850 | B17.2  | NDUFA12   | N7BM            | -              | -                |
| ND7 (49 kDa)                                            | AtMg00510                           | ND7                   | Cre07.g327400 | 49 kDa | NDUFS2    | NUCM            | NUOD           | NQO3             |
| ND9 (30 kDa)                                            | AtMg00070                           | ND9                   | Cre12.g492300 | 30 kDa | NDUFS3    | NUGM            | NUOC           | NQO5             |
| PSST                                                    | At5g11770                           | PSST                  | -             | PSST   | NDUFS7    | NUKM            | NUOB           | NQO6             |
| SDAP-2 (mtACP-2)                                        | At2g44620                           | SDAP1/2               | Cre16.g673109 | SDAP-β | NDUFAB1   | ACPM2           | -              | -                |
| TYKY-1                                                  | At1g79010                           | TYKY                  | Cre12.g496750 | TYKY   | NDUFS8    | NUIM            | NUOI           | NQO9             |
| TYKY-2                                                  | At1g16700                           |                       |               |        |           |                 |                |                  |
| C1-Ferredoxin                                           | At3g07480                           | NUOP3                 | Cre02.g100200 | -      | -         | -               | -              | -                |
| -                                                       |                                     |                       |               | -      | -         | -               | -              | NQO15            |
| <b>► Membrane arm (incl. carbonic anhydrase domain)</b> |                                     |                       |               |        |           |                 |                |                  |
| 15 kDa-1                                                | At3g62790                           | 15 kDa                | Cre12.g511200 | 15kDa  | NDUFS5    | NIPM            | -              | -                |
| 15 kDa-2                                                | At2g47690                           |                       |               |        |           |                 |                |                  |
| -                                                       |                                     | -                     |               | 42 kDa | NDUFA10   | -               | -              | -                |
| AGGG                                                    | At1g76200                           | AGGG                  | n.d.          | AGGG   | NDUFB2    | NIGM            | -              | -                |
| ASHI                                                    | At5g47570                           | ASHI                  | Cre01.g007850 | ASHI   | NDUFB8    | NIAM            | -              | -                |
| B9                                                      | At2g46540                           | B9                    | Cre12.g537050 | B9     | NDUFA3    | NI9M            | -              | -                |
| B12-1                                                   | At1g14450                           | B12                   | Cre05.g244850 | B12    | NDUFB3    | NB2M            | -              | -                |
| B12-2                                                   | At2g02510                           |                       |               |        |           |                 |                |                  |
| B14.5b                                                  | At4g20150                           | B14.5b                | Cre13.g571150 | B14.5b | NDUFC2    | N4BM            | -              | -                |
| B14.7                                                   | At2g42210                           | B14.7                 | Cre14.g617826 | B14.7  | NDUFA11   | NUJM            | -              | -                |
| B15                                                     | At2g31490                           | B15                   | Cre03.g204650 | B15    | NDUFB4    | NB5M            | -              | -                |
| B16.6-1                                                 | At1g04630                           | B16.6                 | Cre16.g664600 | B16.6  | GRIM19    | NB6M            | -              | -                |
| B16.6-2                                                 | At2g33220                           |                       |               |        | = NDUFA13 |                 |                |                  |
| -                                                       |                                     | -                     |               | B17    | NDUFB6    | -               | -              | -                |
| B18                                                     | At2g02050                           | B18                   | Cre06.g278188 | B18    | NDUFB7    | NB8M            | -              | -                |
| B22                                                     | At4g34700                           | B22                   | Cre11.g467668 | B22    | NDUFB9    | NI2M            | -              | -                |
| ESSS-1                                                  | At2g42310                           | ESSS                  | Cre05.g240800 | ESSS   | NDUFB11   | NESM            | -              | -                |
| ESSS-2                                                  | At3g57785                           |                       |               |        |           |                 |                |                  |
| KFYI                                                    | At4g00585                           | KFYI                  | Cre17.g725400 | KFYI   | NDUFC1    | -               | -              | -                |
|                                                         |                                     |                       |               | MNLL   | NDUFB1    | -               | -              | -                |
| MWFE                                                    | At3g08610                           | MWFE                  | Cre10.g459750 | MWFE   | NDUFA1    | NIMM            | -              | -                |
| ND1                                                     | AtMg00516<br>AtMg01120<br>AtMg01275 | ND1                   | AAB93446      | ND1    | ND1       | NU1M            | NUOH           | NQO8             |
| ND2                                                     | AtMg00285<br>AtMg01320              | ND2                   | AAB93444      | ND2    | ND2       | NU2M            | NUON           | NQO14            |
| ND3                                                     | AtMg00990                           | ND3                   | Cre08.g378900 | ND3    | ND3       | NU3M            | NUOA           | NQO7             |
| ND4                                                     | AtMg00580                           | ND4                   | AAB93441      | ND4    | ND4       | NU4M            | NUOM           | NQO13            |
| ND4L                                                    | AtMg00650                           | ND4L                  | Cre09.g402552 | ND4L   | ND4L      | NULM            | NUOK           | NQO11            |
| ND5                                                     | AtMg00060<br>AtMg00513<br>AtMg00665 | ND5                   | AAB93442      | ND5    | ND5       | NU5M            | NUOL           | NQO12            |
| ND6                                                     | AtMg00270                           | ND6                   | AAB93445      | ND6    | ND6       | NU6M            | NUOJ           | NQO10            |
| PDSW-1                                                  | At3g18410                           | PDSW                  | Cre12.g555150 | PDSW   | NDUFB10   | NIDM            | -              | -                |
| PDSW-2                                                  | At1g49140                           |                       |               |        |           |                 |                |                  |
| PGIV-1                                                  | At3g06310                           | PGIV                  | Cre07.g333900 | PGIV   | NDUFA8    | NUPM            | -              | -                |
| PGIV-2                                                  | At5g18800                           |                       |               |        |           |                 |                |                  |
| SDAP-1 (mtACP-1)                                        | At1g65290                           | SDAP1/2               | Cre16.g673109 | SDAP-α | NDUFAB1   | ACPM1           | -              | -                |
| NUXM                                                    | At4g16450                           | NUXM                  | Cre06.g267200 | -      | -         | NUXM            | -              | -                |
| P1 (SGDH?)                                              | At1g67350                           | -                     |               | SGDH   | NDUFB5    | NUNM            | -              | -                |
| P2                                                      | At2g27730                           | -                     |               | -      | -         | -               | -              | -                |
| P9                                                      | At1g67785                           | NUOP9                 | Cre03.g178250 | -      | -         | -               | -              | -                |
| -                                                       |                                     | NUOP4                 | Cre08.g378550 | -      | -         | -               | -              | -                |
| -                                                       |                                     | NUOP5                 | Cre08.g378050 | -      | -         | -               | -              | -                |
| -                                                       |                                     | NUOP7                 | XP_001698808  | -      | -         | -               | -              | -                |
| -                                                       |                                     | NUOP8                 | XP_001692071  | -      | -         | -               | -              | -                |
| CA2                                                     | At1g47260                           | CA2                   | Cre09.g415850 | -      | -         | -               | -              | -                |
| CA1                                                     | At1g19580                           | CA1/CA3               | Cre12.g516450 | -      | -         | -               | -              | -                |
| CA3                                                     | At5g66510                           |                       |               | -      | -         | -               | -              | -                |
| CAL1                                                    | At5g63510                           | CAL                   | Cre06.g293850 | -      | -         | -               | -              | -                |
| CAL2                                                    | At3g48680                           |                       |               | -      | -         | -               | -              | -                |
| -                                                       |                                     | -                     |               | -      | -         | NUUM            | -              | -                |
| -                                                       |                                     | -                     |               | -      | -         | ST1             | -              | -                |

**Supplementary Table 5: Nomenclature of complex I subunits in *Arabidopsis* and other model species.**

Extensions -1 and -2 indicate isoforms present in *Arabidopsis*. In our atomic models of the I+III<sub>2</sub> supercomplex (Fig. 1, Fig. 2), we used the isoform which is more abundant according to our MS data (Supplementary Table 4). Subunits specific for clades are highlighted by colors.

| <i>A. thaliana</i> | accession                 | bovine   | human   | yeast  | <i>R. capsulatus</i> |
|--------------------|---------------------------|----------|---------|--------|----------------------|
| MPP- $\alpha$ -1   | <a href="#">At1g51980</a> | Core 2   | UQCRC2  | Core 2 | -                    |
| MPP- $\alpha$ -2   | <a href="#">At3g16480</a> |          |         |        |                      |
| MPP- $\beta$       | <a href="#">At3g02090</a> | Core 1   | UQCRC1  | Core 1 | -                    |
| Cyt b              | <a href="#">AtMg00220</a> | Cyt b    | MT-CYB  | Cyt b  | Cyt b                |
| Cyt c1-1           | <a href="#">At5g40810</a> | Cyt c1   | CYT1    | Cyt c1 | Cyt c1               |
| Cyt c1-2           | <a href="#">At3g27240</a> |          |         |        |                      |
| Rieske-1           | <a href="#">At5g13430</a> | Rieske   | UQCRFS1 | Rieske | Rieske               |
| Rieske-2           | <a href="#">At5g13440</a> |          |         |        |                      |
| QCR6-1 (Hinge)     | <a href="#">At1g15120</a> | Hinge    | UQCRH   | QCR6   |                      |
| QCR6-2 (Hinge)     | <a href="#">At2g01090</a> | (11 kDa) |         |        |                      |
| QCR7-1 (14 kDa)    | <a href="#">At4g32470</a> | 14 kDa   | UQCRB   | QCR7   | -                    |
| QCR7-2 (14 kDa)    | <a href="#">At5g25450</a> |          |         |        |                      |
| QCR8-1             | <a href="#">At3g10860</a> | 9.5 kDa  | UQCRQ   | QCR8   | -                    |
| QCR8-2             | <a href="#">At5g05370</a> |          |         |        |                      |
| QCR9               | <a href="#">At3g52730</a> | 7.2 kDa  | UQCR10  | QCR9   | -                    |
| QCR10              | <a href="#">At2g40765</a> | 6.4 kDa  | UQCR11  | QCR10  | -                    |

**Supplementary Table 6: Nomenclature of complex III subunits in *Arabidopsis* and other model species.** Extensions -1 and -2 indicate isoforms present in *Arabidopsis*. In our atomic models of the I+III<sub>2</sub> supercomplex (Fig. 1, Fig. 2), we used the isoform which is more abundant according to our MS data (MPP- $\alpha$ -1, Cyt c1-1, Rieske-1, QCR6-1, QCR7-1, QCR8-2; see Supplementary Table 4).

| Name         | Accession                         | precursor length<br>(no. of amino acids) | preseq. length<br>(no of amino acids) | mature sequence length (no of amino acids) | mature mass (kDa) | mature IEP | mature GRAVY |
|--------------|-----------------------------------|------------------------------------------|---------------------------------------|--------------------------------------------|-------------------|------------|--------------|
| 13 kDa       | At3g03070                         | 110                                      | 22                                    | 88                                         | 9.7               | 5.6        | -0.306       |
| 15 kDa-1     | At3g62790                         | 83                                       | 1                                     | 82                                         | 9.8               | 7.9        | -1.288       |
| 18 kDa       | At5g67590                         | 154                                      | 24                                    | 130                                        | 14.4              | 9.1        | -0.770       |
| 24 kDa       | At4g02580                         | 255                                      | 33                                    | 222                                        | 24.6              | 5.9        | -0.402       |
| 39 kDa       | At2g20360                         | 402                                      | 58                                    | 344                                        | 37.7              | 7.9        | -0.028       |
| 51 kDa       | At5g08530                         | 486                                      | 30                                    | 456                                        | 50.1              | 7.5        | -0.329       |
| 75kDa        | At5g37510                         | 745                                      | 59                                    | 686                                        | 74.8              | 6.0        | -0.141       |
| AGGG         | At1g76200                         | 69                                       | 1                                     | 68                                         | 7.4               | 9.0        | -0.572       |
| ASHI         | At5g47570                         | 125                                      | 30                                    | 95                                         | 10.2              | 4.7        | 0.057        |
| B8           | At5g47890                         | 97                                       | 1                                     | 96                                         | 10.7              | 9.5        | -0.311       |
| B9           | At2g46540                         | 65                                       | 1                                     | 64                                         | 6.7               | 9.1        | 0.530        |
| B12-2        | At2g02510                         | 72                                       | 1                                     | 71                                         | 7.9               | 10.0       | -0.537       |
| B13          | At5g52840                         | 169                                      | 11                                    | 158                                        | 17.9              | 4.6        | -0.583       |
| B14          | At3g12260                         | 133                                      | 1                                     | 132                                        | 15.0              | 9.1        | -0.255       |
| B14.5a       | At5g08060                         | 131                                      | 1                                     | 130                                        | 14.9              | 8.6        | -0.734       |
| B14.5b       | At4g20150                         | 81                                       | 1                                     | 80                                         | 9.1               | 8.7        | -0.226       |
| B14.7        | At2g42210                         | 159                                      | 0                                     | 159                                        | 17.0              | 7.9        | -0.050       |
| B15          | At2g31490                         | 71                                       | 1                                     | 70                                         | 8.2               | 9.3        | -0.534       |
| B16.6-2      | At2g33220                         | 143                                      | 1                                     | 142                                        | 16.0              | 9.36       | -0.489       |
| B17.2        | At3g03100                         | 159                                      | 1                                     | 158                                        | 18.2              | 9.3        | -0.792       |
| B18          | At2g02050                         | 103                                      | 0                                     | 103                                        | 11.7              | 7.7        | -0.428       |
| B22          | At4g34700                         | 117                                      | 1                                     | 116                                        | 13.5              | 8.7        | -0.748       |
| CA1          | At1g19580                         | 275                                      | 1                                     | 274                                        | 29.8              | 7.3        | -0.231       |
| CA2          | At1g47260                         | 278                                      | 1                                     | 277                                        | 29.9              | 6.8        | -0.165       |
| CAL2         | At3g48680                         | 256                                      | 26                                    | 230                                        | 25.0              | 6.4        | 0.035        |
| ES55-1       | At2g42310                         | 114                                      | 23                                    | 91                                         | 10.1              | 5.6        | -0.598       |
| FDX-CI       | At3g07480                         | 159                                      | 27                                    | 132                                        | 14.5              | 5.6        | -0.323       |
| KFYI         | At4g00585                         | 88                                       | 1                                     | 87                                         | 9.7               | 9.5        | -0.621       |
| MWFE         | At3g08610                         | 65                                       | 1                                     | 64                                         | 7.2               | 7.9        | -0.222       |
| ND1          | AtMg00516 / AtMg01120 / AtMg01275 | 325                                      | 0                                     | 325                                        | 36.0              | 8.3        | 0.987        |
| ND2          | AtMg00285 / AtMg01320             | 499                                      | 0                                     | 499                                        | 55.5              | 8.7        | 0.936        |
| ND3          | AtMg00990                         | 119                                      | 0                                     | 119                                        | 13.9              | 4.4        | 0.892        |
| ND4          | AtMg00580                         | 495                                      | 1                                     | 494                                        | 55.9              | 8.8        | 0.949        |
| ND4L         | AtMg00650                         | 100                                      | 0                                     | 100                                        | 11.2              | 5.0        | 1.394        |
| ND5          | AtMg00060 / AtMg00513 / AtMg00665 | 669                                      | 0                                     | 669                                        | 74.5              | 6.6        | 0.753        |
| ND6          | AtMg00270                         | 205                                      | 0                                     | 205                                        | 23.7              | 9.6        | 0.876        |
| ND7 / 49 kDa | AtMg00510                         | 394                                      | 1                                     | 393                                        | 44.8              | 6.7        | -0.181       |
| ND9 / 30 kDa | AtMg00070                         | 190                                      | 0                                     | 190                                        | 22.9              | 6.9        | -0.581       |
| NUXM         | At4g16450                         | 106                                      | 0                                     | 106                                        | 11.3              | 9.9        | 0.024        |
| P1           | At1g67350                         | 98                                       | 1                                     | 97                                         | 11.7              | 5.35       | -1.010       |
| P2           | At2g27730                         | 113                                      | 1                                     | 112                                        | 11.8              | 9.6        | -0.488       |
| P9           | At1g67785                         | 63                                       | 1                                     | 62                                         | 7.4               | 6.9        | -0.455       |
| PDSW-1       | At3g18410                         | 106                                      | 1                                     | 105                                        | 12.3              | 8.0        | -0.983       |
| PGIV-2       | At5g18800                         | 106                                      | 1                                     | 105                                        | 11.8              | 7.49       | -0.514       |
| PSST         | At5g11770                         | 218                                      | 22                                    | 196                                        | 21.6              | 9.2        | -0.160       |
| SDAP-1       | At1g65290                         | 126                                      | 0                                     | 126                                        | 14.2              | 4.6        | -0.194       |
| SDAP-2       | At2g44620                         | 122                                      | 0                                     | 122                                        | 13.7              | 4.9        | -0.148       |
| TYKY-1       | At1g79010                         | 222                                      | 16                                    | 206                                        | 23.7              | 5.0        | -0.599       |
| Σ            |                                   | 9,440                                    | 404                                   | 9,036                                      | 1009.7            |            |              |
| Ø            |                                   | 197                                      |                                       | 188.25                                     | 21.0              | 7.5        | -0.199       |

**Supplementary Table 7: Calculated properties of the 48 complex I subunits of *Arabidopsis*.** The molecular mass refers to the mass of the mature subunits (excluding mitochondrial targeting sequences, if present, or removed initiator methionines; data from<sup>2</sup>. For subunits occurring in isoforms, the predominant isoform within our Cryo-EM structure (Fig. 1, Fig. 2) was selected, respectively. Note that the molecular mass calculation does not include the prosthetic groups (see Extended Data Fig. 2) attached to several of the subunits. Some residues appear at a higher mass due to posttranslational modifications.

*Arabidopsis* complex I includes 48 subunits with overall 9,036 amino acids; it has a molecular mass of 1,009.7 kDa.



| Name             | Accession | precursor length<br>(no. of amino acids) | preseq. length<br>(no of amino acids) | mature sequence length (no of amino acids) | mature mass (kDa) | mature IEP | mature GRAVY |
|------------------|-----------|------------------------------------------|---------------------------------------|--------------------------------------------|-------------------|------------|--------------|
| MPP- $\alpha$ -1 | At1g51980 | 503                                      | 26                                    | 477                                        | 51.5              | 5.29       | -0.11        |
| MPP- $\beta$     | At3g02090 | 531                                      | 25                                    | 506                                        | 56.2              | 5.74       | -0.34        |
| Cyt b            | AtMg00220 | 393                                      | 1                                     | 392                                        | 44.2              | 6.64       | 0.63         |
| Cyt c1-1         | At5g40810 | 307                                      | 64                                    | 243                                        | 27.2              | 5.12       | -0.37        |
| Rieske-1         | At5g13430 | 272                                      | 60                                    | 212                                        | 23.2              | 6.51       | -0.12        |
| QCR6-1           | At1g15120 | 69                                       | 1                                     | 68                                         | 7.9               | 7.78       | -0.67        |
| QCR7-1           | At4g32470 | 122                                      | 1                                     | 121                                        | 14.4              | 9.73       | -0.65        |
| QCR8-2           | At5g05370 | 72                                       | 1                                     | 71                                         | 8.3               | 9.48       | -0.28        |
| QCR9             | At3g52730 | 72                                       | 0                                     | 72                                         | 8.4               | 9.45       | -0.47        |
| QCR10            | At2g40765 | 57                                       | 1                                     | 56                                         | 5.8               | 8.42       | 0.20         |
| $\Sigma$         |           | 2,398                                    | 180                                   | 2,218                                      | 247.1             |            |              |
| $\emptyset$      |           | 240                                      |                                       | 221,8                                      | 24.7              | 7.4        | -0.218       |

**Supplementary Table 8: Calculated properties of the 10 complex III subunits in *Arabidopsis*.** The molecular mass refers to the mature subunits (excluding mitochondrial targeting sequences, if present, or removed initiator methionines; data in accordance with *Solanum tuberosum*<sup>3</sup>. For subunits present in different isoforms, the predominant isoform within our cryo-EM structure (Fig. 1, Fig. 2) is selected, respectively. Note that the molecular mass calculation does not include prosthetic groups (see Extended Data Fig. 2) attached to some subunits. Some residues appear at a higher mass due to posttranslational modifications.

*Arabidopsis* complex III<sub>2</sub> includes 2x10 subunits with overall 4,436 amino acids; it has a molecular mass of 494.2 kDa.

The *Arabidopsis* I+III<sub>2</sub> supercomplex includes 48 complex I subunits and 2x10 complex III subunits = 68 subunits. The supercomplex includes 13,472 amino acids. It has a calculated molecular mass of 1,503.9 kDa

| <i>Arabidopsis</i> complex III <sub>2</sub> |             | <i>Arabidopsis</i> complex I |             |
|---------------------------------------------|-------------|------------------------------|-------------|
| Amino acid                                  | copy number | Amino acid                   | copy number |
| L                                           | 432         | L                            | 895         |
| A                                           | 408         | A                            | 700         |
| V                                           | 326         | G                            | 683         |
| S                                           | 316         | V                            | 657         |
| G                                           | 296         | S                            | 597         |
| E                                           | 266         | I                            | 573         |
| P                                           | 252         | E                            | 529         |
| I                                           | 242         | R                            | 490         |
| K                                           | 228         | K                            | 473         |
| D                                           | 222         | F                            | 471         |
| T                                           | 220         | P                            | 465         |
| R                                           | 216         | T                            | 440         |
| Y                                           | 194         | D                            | 422         |
| F                                           | 190         | Y                            | 310         |
| N                                           | 156         | N                            | 304         |
| Q                                           | 138         | M                            | 268         |
| H                                           | 112         | Q                            | 253         |
| M                                           | 108         | H                            | 194         |
| W                                           | 70          | C                            | 164         |
| C                                           | 44          | W                            | 148         |
| Σ                                           | 4436        | Σ                            | 9036        |

**Supplementary Table 9: Amino acid composition of *Arabidopsis* complex III<sub>2</sub> (2x10 subunits) and *Arabidopsis* complex I (48 subunits).**

## References for Supplementary Figures and Tables

1. Dudkina, N.V., Eubel, H., Keegstra, W., Boekema, E.J. & Braun, H.P. Structure of a mitochondrial supercomplex formed by respiratory-chain complexes I and III. *Proc Natl Acad Sci U S A* **102**, 3225-3229 (2005).
2. Senkler, J., Senkler, M. & Braun, H.P. Structure and function of complex I in animals and plants - a comparative view. *Physiologia Plantarum* **161**, 6-15 (2017).
3. Braun, H.P. & Schmitz, U.K. The bifunctional cytochrome c reductase/processing peptidase complex from plant mitochondria. *J Bioenerg Biomembr* **27**, 423-36 (1995).
